1     **Undocumented potential for primary productivity in a globally-distributed**  
2                                   **bacterial photoautotroph**

3                                   **Authors:** E.D. Graham<sup>1</sup>, J.F. Heidelberg<sup>1,2</sup>, B.J. Tully<sup>\*1,2</sup>

4     **Author Affiliations:**

5     <sup>1</sup>Department of Biological Sciences, University of Southern California, Los Angeles, CA, USA

6     <sup>2</sup>Center for Dark Energy Biosphere Investigations, University of Southern California, Los  
7     Angeles, CA, USA

8     \*Corresponding Author: Benjamin Tully, [tully.bj@gmail.com](mailto:tully.bj@gmail.com)

9     Keywords: autotrophy; marine carbon cycle; metagenomics; Alphaproteobacteria; aerobic  
10    anoxygenic phototrophs  
11

12 **Abstract:** Aerobic anoxygenic phototrophs (AAnPs) are common in the global oceans and are  
13 associated with photoheterotrophic activity. To date, AAnPs have not been identified in the  
14 surface ocean that possess the potential for carbon fixation. Using the *Tara Oceans* metagenomic  
15 dataset, we have reconstructed high-quality genomes of four bacteria that possess the genomic  
16 potential for anoxygenic phototrophy, carbon fixation via the Calvin-Benson-Bassham cycle, and  
17 the oxidation of sulfite and thiosulfate. Forming a monophyletic clade within the  
18 *Alphaproteobacteria* and lacking cultured representatives, the organisms compose minor  
19 constituents of local microbial communities (0.1-1.0%), but are globally distributed, present in  
20 multiple samples from the North Pacific, Mediterranean Sea, the East Africa Coastal Province,  
21 and the South Atlantic. These organisms represent a shift in our understanding of microbially-  
22 mediated photoautotrophy in the global oceans and provide a previously undiscovered route of  
23 primary productivity.

24  
25 **Significance Statement:** In examining the genomic content of organisms collected during the  
26 *Tara Oceans* expedition, we have identified a novel clade within the *Alphaproteobacteria* that  
27 has the potential for photoautotrophy. Based on genome observations, these organisms have the  
28 potential to couple inorganic sulfur compounds as electron donors to fix carbon into biomass.  
29 They are globally distributed, present in samples from the North Pacific, Mediterranean Sea, East  
30 Africa Coastal Current, and the South Atlantic. This discovery may require re-examination of the  
31 microbial communities in the global ocean to understand and constrain the impacts of this group  
32 of organisms on the global carbon cycle.

## 33 Introduction

34 It has been understood for decades that the basis of the global marine carbon cycle are  
35 oxygenic photoautotrophs that perform photoautotrophic processes. Two additional phototrophic  
36 processes are common in the ocean and are mediated by proteorhodopsin-containing  
37 microorganisms and aerobic anoxygenic phototrophs (AAnPs). Proteorhodopsins and AAnPs  
38 have historically been associated with photoheterotrophy<sup>1,2</sup>, a process that supplements  
39 additional energy to microorganisms beyond what is obtained as part of a heterotrophic  
40 metabolic strategy. AAnPs utilize bacteriochlorophyll (BChl *a*), are globally distributed<sup>3</sup>, and  
41 have been identified in phylogenetically diverse groups of microorganisms<sup>4-6</sup>. Though anaerobic  
42 microorganisms with BChl *a* are known to fix CO<sub>2</sub><sup>7</sup> and marine AAnPs can incorporate  
43 inorganic carbon via anaplerotic reactions<sup>8</sup>, marine AAnPs have not been linked to carbon  
44 fixation<sup>9</sup>. The identification of marine AAnPs capable of carbon fixation adds to our  
45 understanding of microbial photosynthesis in the global oceans and represents a previously  
46 undiscovered route of photoautotrophy.

47 The *Tara Oceans* expedition generated microbial metagenomes during a  
48 circumnavigation of the global oceans<sup>10,11</sup>. *Tara Oceans* samples were collected from 63 sites in  
49 10 major ocean provinces, with most sites contributing multiple sampling depths (generally,  
50 surface, deep chlorophyll maximum [DCM], and mesopelagic) and multiple size fractions  
51 (generally, ‘viral’, ‘girus’ [giant virus], ‘bacterial’, and ‘protistan’) from each depth  
52 (Supplementary Information 1). We independently assembled each sample and assemblies from  
53 all samples within a province were combined and subjected to binning techniques to reconstruct  
54 microbial genomes (Fig. 1 and Extended Data Fig. 1). Microbial genomes reconstructed from  
55 eight of ten provinces (Mediterranean, Red Sea, Arabian Sea, Indian Monsoon Gyre, East Africa  
56 Coastal, South Atlantic, and North Pacific; 36 sites, 134 samples) were annotated using the  
57 KEGG Ontology (KO) system<sup>12</sup> and examined for the genes and pathways of interest.

## 58 Results and Discussion

59 From 1,774 metagenome-assembled genomes (MAGs), 53 genomes possessed the genes  
60 encoding the core subunits of type-II photochemical reaction centers (PufLM). Of those 53, four  
61 genomes (MED800, EAC638, SAT68, NP970; Fig. 1) also contained genes for ribulose-1,5-  
62 bisphosphate carboxylase (Rubisco; RbsLS; Fig. 2). Rubisco has four major forms, of which  
63 three (Types I, II, and III) have been shown to fix CO<sub>2</sub> and two are known to participate in the  
64 Calvin-Benson-Bassham (CBB) cycle (Types I and II<sup>13,14</sup>). Phylogenetic placement of the  
65 Rubisco large subunits recovered from the genomes revealed them to be of the Type IC/D  
66 subgroup<sup>13</sup>, suggesting that the identified proteins represent *bona fide* Rubiscos capable of  
67 carbon fixation (Fig. 2). Within the Type IC/D subgroup, the Rubisco sequences from the four  
68 analyzed genomes formed a distinct cluster with environmental sequences derived from the  
69 Global Ocean Survey (GOS) metagenomes<sup>15,16</sup>, but lacking sequences from reference organisms.

70 Similarly, the PufM sequences from the analyzed *Tara* genomes did not cluster with  
71 reference sequences, instead grouping with sequences from the GOS metagenomes<sup>15</sup>. Sequences  
72 from MED800, SAT68, and NP970 were group together in one cluster, while EAC638 was  
73 located in a separate cluster (Fig. 3). The MED800/SAT68/NP970 clade is basal to the  
74 previously identified phylogroups E and F, while the EAC638 clade is basal to the *Roseobacter*-  
75 related phylogroup G<sup>17</sup>. As MED800, EAC638, SAT68, and NP970 branch in distinct clades on  
76 both the RbsL and PufM trees that consist of entirely environmental sequences, it may be

77 possible that these clades represent a phylogenetically coherent group of organisms with the  
78 potential for both phototrophy and carbon fixation.

79 The genomes were of high-quality (66-85% complete; <5.5% duplication; Table 1) with  
80 sufficient phylogenetic markers for accurate placement (Extended Data Table 1). The four  
81 organisms form a monophyletic clade basal to the Family *Rhodobacteraceae* (Fig. 4). The  
82 relationship between the genomes would suggest that NP970, SAT68, and MED800 are  
83 phylogenetically more closely related to each other than either are to EAC638. As is common  
84 with assembled metagenomic sequences, the recovered genomes lack a distinguishable 16S  
85 rRNA gene sequence. However, based on the observed phylogenetic distance in the concatenated  
86 marker tree, we suggest that these organisms represent a new clade within the  
87 *Rhodobacteraceae*, and possibly a family-level clade previously without a reference sequence  
88 within the *Alphaproteobacteria*. We propose that NP970, SAT68, and MED800 represent three  
89 species within the same genus (tentatively named, '*Candidatus Luxescamonas taraoceani*'), with  
90 EAC638 as a representative of a species in a sister genus (tentatively named, '*Candidatus*  
91 *Luxescabacter africanus*').

92 In addition to Rubisco, all four genomes contained genes encoding phosphoribulokinase,  
93 an essential gene of the CBB cycle, and 50-89% of the genes necessary to perform complete  
94 carbon fixation (Fig. 5). The BChl *a* genes in MED800, EAC638, SAT68, and NP970 were  
95 accompanied by bacteriochlorophyll biosynthesis and light-harvesting genes (Supplementary  
96 Information 2). This complement of bacteriochlorophyll biosynthesis and essential carbon  
97 fixation genes support a role for autotrophy within these organisms beyond the identified marker  
98 genes.

99 All four genomes possessed ATP-binding cassette (ABC) type transporters for  
100 spermidine/putrescine and L- and branched-chain amino acids. These transporters are indicative  
101 of the utilization of organic nitrogen compounds, as spermidine and putrescine are nitrogen rich  
102 organic compounds, while the scavenging of amino acids reduces the overall nitrogen demands  
103 of the cell. Further, the genomes lacked transporters and degradation enzymes for many of the  
104 saccharides common in the marine environment<sup>18</sup> (Fig. 5). However, MED800, SAT68, and  
105 NP970 possessed an ABC-type  $\alpha$ -glucoside transporter, an annotated  $\beta$ -glucosidase in SAT68,  
106 and D-xylose and D-ribose ABC-type transporters in EAC638. While autotrophs are generally  
107 considered to not require external sources of organic carbon, saccharide transporters are  
108 commonly observed in classical photoautotrophic organisms<sup>19,20</sup>, including the specific example  
109 of  $\alpha$ -glucoside transporters in strains of *Synechocystis*<sup>21</sup>. For the four genomes, the minimal  
110 number of carbon transport and degradation genes may suggest that the organisms have a limited  
111 capacity to utilize dissolved organic carbon compounds, but are capable of heterotrophic growth  
112 under certain conditions. As such, the genomic potential of these organisms suggest that NP970,  
113 SAT68, MED800, and EAC638 are likely facultative autotrophs or mixotrophs.

114 In oxygenic photosynthesis, electrons are donated as a result of the oxidation of water.  
115 Lacking photosystem II, BChl *a*-containing organisms are incapable of oxidizing water and  
116 would require an alternative electron donor for autotrophic processes. EAC638 and SAT68  
117 contained the full/partial suite of genes necessary for thiosulfate oxidation, while MED800,  
118 NP970, and SAT68 possessed the genes for oxidizing sulfite. The oxidation of sulfur compounds  
119 has previously been linked to autotrophy in the marine environment<sup>22</sup>. The oxidation of organic  
120 sulfur compounds, like dimethyl sulfide, has been shown to be a source of thiosulfate<sup>23</sup> and  
121 sulfite<sup>24</sup> in the marine environment. Electrons derived from inorganic sulfur sources (thiosulfate

122 and/or sulfite) could be transferred directly through cytochromes or membrane-bound quinone  
123 dehydrogenases to the electron transport chain. Electrons could be shuttled to reaction centers to  
124 generate proton motive force necessary to convert NADH to NADPH via transhydrogenase  
125 (reverse electron flow) and generate ATP for the CBB cycle (Fig. 5).

126 The reconstruction of four genomes from the same novel family in four different  
127 provinces (North Pacific, Mediterranean, East Africa coastal current, and South Atlantic)  
128 suggests that the observed genomes represent an *in situ* microbial population from the surface  
129 marine environment. Each of the genomes recruit metagenomic reads from multiple sampling  
130 sites in each province and are present at >0.1% of the microbial relative abundance (range: 0.1-  
131 1.04%; mean: 0.286%) in 20 samples (Fig. 1; Supplemental Information 1). Predominantly, the  
132 genomes were present in samples are located in the surface (n = 5) or DCM (n = 12). These  
133 organisms were collected at depths where light was available for photosynthesis and less  
134 frequently identified at deeper depths (n = 3 mesopelagic samples). When >0.1% relative  
135 abundance, the genomes tend to be more abundant in the ‘bacterial’/‘girus’ size fraction (n = 14),  
136 though were also observed in ‘protistan’ (n = 4), and ‘viral’ (n = 2) size fractions (Supplemental  
137 Information 1). The nature of the ‘bacterial’ size fractions suggests that these organisms are  
138 generally not particle attached and <1.6µm in size. The occurrence in the protistan fraction may  
139 be due to slightly larger cells or attachment to particles, but this data are difficult to interpret as  
140 the ‘protistan’ and ‘bacterial’ size fractions can overlap (0.8-1.6µm). As members of the free-  
141 living bacterioplankton, these organisms should be poised to grow in aerobic conditions. All four  
142 genomes possessed the genes encoding for cytochromes involved in aerobic metabolisms (aa<sub>3</sub>-  
143 and bc<sub>1</sub>-type), and lacked the genes for cytochromes involved in microaerobic metabolisms and  
144 alternative electron acceptors. Further, all four genomes encoded the gene for an oxygen-  
145 dependent ring cyclase (*acsF*), a necessary component in bacteriochlorophyll biosynthesis for  
146 which there is alternative that is oxygen-independent (*bchE*) and used by anaerobic organisms.

147 With this discovery, the potential photosynthesis in the ocean has expanded beyond  
148 organisms harboring chlorophyll *a* to include *Alphaproteobacteria* with BChl *a*. Though these  
149 organisms have not been cultivated or sequenced before, both PufM and Rubisco in MED800,  
150 EAC638, NP970, and SAT68 are phylogenetically related to GOS-derived proteins, lending  
151 credence to the fact that these organisms may be a persistent element of oceanic carbon fixation.  
152 As such, clades of environmentally sampled genes (*rbsL* and *pufM*) can now be linked to a  
153 previously unrecognized source of marine primary productivity. Because carbon fixation  
154 estimates are broadly estimated by the concentration of chlorophyll compounds (specifically  
155 chlorophyll *a*), current values are likely incomplete and do account for the contributions of  
156 bacteriochlorophyll-containing, carbon fixing AAnPs. The identification of a globally distributed  
157 clade of AAnPs in the ocean capable of carbon fixation continues to expand our understanding of  
158 the marine carbon cycle.

## 159 **Materials and Methods:**

### 160 *Assembly*

161 All sequences for the reverse and forward reads from each sampled station and depth within the  
162 *Tara Oceans* dataset were accessed from European Molecular Biology Laboratory (EMBL)<sup>10,11</sup>.  
163 Typically, *Tara* sampling sites have multiple metagenomic samples, representing different  
164 sampling depths and size fractions. The common size fractions were used during sampling were:  
165 ‘bacterial’ (0.22-1.6µm) (includes Mediterranean ‘girus’ samples), ‘protistan’ (0.8-5.0µm),

166 ‘girus’ (0.45-0.8 $\mu$ m) and ‘viral’ (<0.22 $\mu$ m). Surface samples were collected at ~5-m depth, while  
167 deep chlorophyll maximum (DCM) and mesopelagic depths were variable depending the  
168 physiochemical features of the site. Paired-end reads from different filter sizes from each site and  
169 depth (e.g., TARA0007, girus filter fraction, sampled at the DCM) were assembled using  
170 Megahit<sup>25</sup> (v1.0.3; parameters: --preset, meta-sensitive) (Supplementary Information 1). All of  
171 the Megahit assemblies from each province were pooled in to two tranches based on assembly  
172 size, <2kb and  $\geq$ 2kb. Longer assemblies ( $\geq$ 2kb) with  $\geq$ 99% semi-global identity were combined  
173 using CD-HIT-EST<sup>26</sup> (v4.6; -T 90 -M 500000 -c 0.99 -n 10). The reduced set of contiguous  
174 DNA fragments (contigs)  $\geq$ 2kb was then cross-assembled using Minimus2<sup>27</sup> (AMOS v3.1.0;  
175 parameters: -D OVERLAP=100 MINID=95).

### 176 *Binning*

177 Contigs from each province were initially clustered into tentative genomic bins using  
178 BinSanity<sup>28</sup>. Due to computational limitations, the South Atlantic, East African Coastal province,  
179 and Mediterranean Sea were initially run with contig size cutoffs of 11.5kbp, 7.5kbp, and 7kbp,  
180 respectively. The BinSanity workflow was run iteratively three times using variable preference  
181 values (v.0.2.5.5; parameters: -p [(1) -10, (2) -5, (3) -3] -m 4000 -v 400 -d 0.95). Between each  
182 of the three main clustering steps, refinement was performed based on sequence composition  
183 (parameters: -p [(1) -25, (2) -10, (3) -3] -m 4000 -v 400 -d 0.95 -kmer 4). After refinement and  
184 before the next pass with BinSanity, bins were evaluated using CheckM<sup>29</sup> (v.1.0.3; parameters:  
185 lineage\_wf, default settings) for completion and redundancy. High-quality genomes were  
186 considered those that were >90% complete with <10% contamination, >80% complete with <5%  
187 contamination, or >50% complete with <2% contamination. Bins representing high-quality  
188 genomes were removed from subsequent rounds of clustering. After identification of the four  
189 genomes of interest (initially 51-84% complete, <7.0% contamination), binning was performed  
190 with CONCOCT<sup>30</sup> (v.0.4.1; parameters: -c 800 -I 500) on contigs >5kb from each province that  
191 had a produced a genome of interest. To improve completion estimates, overlapping CONCOCT  
192 and BinSanity bins were visualized using Anvi'o<sup>31</sup> (v.2.1.0) and manually refined to improve  
193 genome completion and minimize contamination estimates (Extended Data Fig. 3-6).

### 194 *Annotation*

195 Putative DNA coding sequences (CDSs) were predicted for each genome using Prodigal<sup>32</sup>  
196 (v.2.6.2; -m -p meta). Putative CDS were submitted for annotation by the KEGG database using  
197 BlastKOALA<sup>12</sup> (taxonomy group, Prokaryotes; database, genus\_prokaryotes +  
198 family\_eukaryotes; Accessed March 2017) (Supplementary Information Table 3). Assessment of  
199 pathways and metabolisms of interest were determined using the script KEGG-decoder.py  
200 ([www.github.com/bjtully/BioData/tree/master/KEGGDecoder](http://www.github.com/bjtully/BioData/tree/master/KEGGDecoder)). Genomes of interested were  
201 determined based on the presence of genes assigned as the M subunit of type-II photochemical  
202 reaction center (PufLM) and ribulose-1,5-bisphosphate carboxylase (RbsLS). After confirmation  
203 of the genes of interest (see below), additional annotations were performed for the genomes  
204 using the Rapid Annotation using Subsystem Technology (RAST) service (Classic RAST default  
205 parameters - Release70)<sup>33</sup>.

### 206 *Phylogeny*

207 An initial assessment of phylogeny was conducted using pplacer<sup>34</sup> within CheckM. The  
208 Prodigal-derived CDSs were searched for a collection of single-copy marker genes that was  
209 common to all four *Tara* assembled genomes using hidden Markov models collected from the



210 Pfam database<sup>35</sup> (Accessed March 2017) and HMMER<sup>36</sup> (v3.1b2; parameters: hmmsearch -E  
211 1e-10 --notextw). 17 marker genes were identified that met this criteria<sup>37-39</sup> (Extended Data  
212 Table 1). The 17 markers were identified in 2,889 reference genes from complete and partial  
213 genomes accessed from NCBI Genbank<sup>40</sup> (Supplementary Information 4). If a genome contained  
214 multiple copies of a single marker gene both were excluded from the final tree. Only genomes  
215 containing  $\geq 10$  markers were used for phylogenetic placement. Each marker set was aligned  
216 using MUSCLE<sup>41</sup> (v3.8.31; parameter: -maxiters 8) and trimmed using TrimAL<sup>42</sup> (v.1.2rev59;  
217 parameter: -automated1). Alignments were then manually assessed and concatenated in  
218 Geneious<sup>43</sup>. An approximate maximum likelihood tree was generated using FastTree<sup>44</sup> (v.2.1.3;  
219 parameters: -gtr -gamma; Supplementary Information 5). A simplified version of this  
220 phylogenetic tree was constructed using the same protocol, but with 160 reference genomes for  
221 Fig. 2 (Supplementary Information 6 and 7).

### 222 *Phylogenetic tree – Rubisco and Bacteriochlorophyll*

223 RbsL and PufM sequences representing previously described lineages were collected<sup>13,17</sup>  
224 (Supplementary Information 8 and 9). Additional reference PufM sequences were collected from  
225 environmentally generated bacterial artificial chromosomes<sup>5</sup> and Integrated Microbial Genomes  
226 (IMG; Accessed Feb 2017)<sup>45</sup>. Protein sequences from IMG were assessed based on genomes  
227 with KEGG Ontology (KO) annotations<sup>46</sup> for the reaction center subunit M (K08929). PufM  
228 sequences from Prodigal predicted CDS (as above) of Global Ocean Survey (GOS) assemblies<sup>16</sup>  
229 were identified using DIAMOND<sup>47</sup> (v.0.8.36.98; parameters: BLASTP, default settings), where  
230 all reference and *Tara* genome sequences were used as a query. Two separate phylogenetic trees  
231 were constructed (RbsL and PufM) using the following methodology. Sequences were aligned  
232 using MUSCLE<sup>41</sup> (parameter: -maxiters 8) and automatically trimmed using TrimAL<sup>42</sup>  
233 (parameter: -automated1) (Supplementary Information 10 and 11). After manual assessment,  
234 trimmed alignments were used to construct approximately-maximum-likelihood phylogenetic  
235 trees using FastTree<sup>44</sup> (parameters: -gtr -gamma) (Supplementary Information 12 and 13).

### 236 *Relative abundance of genomes in each sample*

237 Reads from each sample were recruited against all assemblies  $\geq 2$ kb from the same province  
238 using Bowtie2<sup>48</sup> (parameters: default settings), under the assumptions that contigs  $< 2$ kb would  
239 include, low abundance bacteria and archaea, bacteria and archaea with high degrees of  
240 repeats/assembly poor regions, fragmented picoeukaryotic genomes, and problematic read  
241 sequences (low quality, sequencing artefacts, etc.). For the four sets of contigs (North Pacific,  
242 Mediterranean, East Africa Coastal province, and South Atlantic), putative CDS were  
243 determined via Prodigal (parameters: see above). In order to estimate the relative abundance of  
244 the four analyzed genomes within the bacteria and archaea portion of the total microbial  
245 community (excluding eukaryotes and viruses), single-copy marker genes were identified using a  
246 collection of previously identified HMMs<sup>49,50</sup> and searched using HMMER<sup>36</sup> (hmmsearch --  
247 notextw --cut\_tc). Markers belonging to the four genomes were isolated from the total set of  
248 environmental markers. The number of reads aligned to each marker was determined using  
249 BEDTools<sup>51</sup> (v2.17.0; multicov default parameters). Length-normalized relative abundance  
250 values were determined for each genome (Supplementary Information 1):

$$251 \frac{\sum \text{Reads bp}^{-1} \text{ genome markers}}{\sum \text{Reads bp}^{-1} \text{ metagenome contig markers}} \times 100$$

252 *Data availability*

253 Data is available... submission to NCBI is ongoing. [Currently data is available at FigShare,  
254 including high resolution copies of figures, contig and protein sequences, and all supplementary  
255 information files: <https://figshare.com/s/9f603e9bbef71164e61b>]

256 **References:**

- 257 1. Bėjá, O., Spudich, E. N., Spudich, J. L., Leclerc, M. & DeLong, E. F. Proteorhodopsin phototrophy in the  
258 ocean. *Nature* **411**, 786–789 (2001).
- 259 2. Harashima, K., Kawazoe, K., Yoshida, I. & Kamata, H. Light-Stimulated Aerobic Growth of Erythrobacter  
260 Species Och-114. *Plant and Cell Physiology* **28**, 365–374 (1987).
- 261 3. Schwalbach, M. S. & Fuhrman, J. A. Wide-ranging abundances of aerobic anoxygenic phototrophic bacteria  
262 in the world ocean revealed by epifluorescence microscopy and quantitative PCR. *Limnology and*  
263 *Oceanography* **50**, 620–628 (2005).
- 264 4. Koblížek, M. Ecology of aerobic anoxygenic phototrophs in aquatic environments. *FEMS Microbiol. Rev.*  
265 **39**, 854–870 (2015).
- 266 5. Bėjá, O. *et al.* Unsuspected diversity among marine aerobic anoxygenic phototrophs. *Nature* **415**, 630–633  
267 (2002).
- 268 6. Kang, I. *et al.* Genome Sequence of Fulvimarina pelagi HTCC2506T, a Mn(II)-Oxidizing  
269 Alphaproteobacterium Possessing an Aerobic Anoxygenic Photosynthetic Gene Cluster and  
270 Xanthorhodopsin. *J. Bacteriol.* **192**, 4798–4799 (2010).
- 271 7. Frigaard, N.-U. Biotechnology of Anoxygenic Phototrophic Bacteria. *Adv. Biochem. Eng. Biotechnol.* **156**,  
272 139–154 (2016).
- 273 8. Hauruseu, D. & Koblížek, M. Influence of Light on Carbon Utilization in Aerobic Anoxygenic Phototrophs.  
274 *Appl. Environ. Microbiol.* **78**, 7414–7419 (2012).
- 275 9. Moran, M. A. *et al.* Deciphering ocean carbon in a changing world. *Proceedings of the National Academy of*  
276 *Sciences* **113**, 3143–3151 (2016).
- 277 10. Pesant, S. *et al.* Open science resources for the discovery and analysis of Tara Oceans data. *Sci. Data* **2**,  
278 150023–16 (2015).
- 279 11. Sunagawa, S. *et al.* Ocean plankton. Structure and function of the global ocean microbiome. *Science* **348**,  
280 1261359–1261359 (2015).
- 281 12. Kanehisa, M., Sato, Y. & Morishima, K. BlastKOALA and GhostKOALA: KEGG Tools for Functional  
282 Characterization of Genome and Metagenome Sequences. *Journal of Molecular Biology* **428**, 726–731  
283 (2016).
- 284 13. Tabita, F. R. *et al.* Function, Structure, and Evolution of the RubisCO-Like Proteins and Their RubisCO  
285 Homologs. *Microbiol. Mol. Biol. Rev.* **71**, 576–599 (2007).
- 286 14. Badger, M. R. & Bek, E. J. Multiple Rubisco forms in proteobacteria: their functional significance in  
287 relation to CO<sub>2</sub> acquisition by the CBB cycle. *Journal of Experimental Botany* **59**, 1525–1541 (2007).
- 288 15. Rusch, D. B. *et al.* The Sorcerer II Global Ocean Sampling Expedition: Northwest Atlantic through Eastern  
289 Tropical Pacific. *Plos Biol* **5**, e77 (2007).
- 290 16. Venter, J. C. *et al.* Environmental genome shotgun sequencing of the Sargasso Sea. *Science* **304**, 66–74  
291 (2004).
- 292 17. Yutin, N. *et al.* Assessing diversity and biogeography of aerobic anoxygenic phototrophic bacteria in surface  
293 waters of the Atlantic and Pacific Oceans using the Global Ocean Sampling expedition metagenomes.  
294 *Environ. Microbiol.* **9**, 1464–1475 (2007).
- 295 18. Baker, B. J., Lazar, C. S., Teske, A. P. & Dick, G. J. Genomic resolution of linkages in carbon, nitrogen, and  
296 sulfur cycling among widespread estuary sediment bacteria. *Microbiome* **3**, 14 (2015).
- 297 19. Gómez-Baena, G. *et al.* Glucose Uptake and Its Effect on Gene Expression in Prochlorococcus. *PLoS ONE*  
298 **3**, e3416–11 (2008).
- 299 20. Michelou, V. K., Cottrell, M. T. & Kirchman, D. L. Light-Stimulated Bacterial Production and Amino Acid  
300 Assimilation by Cyanobacteria and Other Microbes in the North Atlantic Ocean. *Appl. Environ. Microbiol.*  
301 **73**, 5539–5546 (2007).
- 302 21. Kaneko, T. *et al.* Sequence analysis of the genome of the unicellular cyanobacterium Synechocystis sp.  
303 strain PCC6803. II. Sequence determination of the entire genome and assignment of potential protein-coding  
304 regions. *DNA Res.* **3**, 109–136 (1996).



- 305 22. Swan, B. K. *et al.* Potential for Chemolithoautotrophy Among Ubiquitous Bacteria Lineages in the Dark  
306 Ocean. *Science* **333**, 1296–1300 (2011).
- 307 23. de Zwart, J., Nelisse, P. N. & Kuenen, J. G. Isolation and characterization of Methylophaga sulfidovorans sp  
308 nov: An obligately methylotrophic, aerobic, dimethylsulfide oxidizing bacterium from a microbial mat.  
309 *FEMS Microbiol. Ecol.* **20**, 261–270 (1996).
- 310 24. Kelly, D. P., Baker, S. C., Trickett, J., Davey, M. & Murrell, J. C. Methanesulphonate utilization by a novel  
311 methylotrophic bacterium involves an unusual monooxygenase. *Microbiology* **140**, 1419–1426 (1994).
- 312 25. Li, D. *et al.* MEGAHIT v1.0: A fast and scalable metagenome assembler driven by advanced methodologies  
313 and community practices. *Methods* **102**, 3–11 (2016).
- 314 26. Fu, L., Niu, B., Zhu, Z., Wu, S. & Li, W. CD-HIT: accelerated for clustering the next-generation sequencing  
315 data. *Bioinformatics* **28**, 3150–3152 (2012).
- 316 27. Treangen, T. J., Sommer, D. D., Angly, F. E., Koren, S. & Pop, M. Next generation sequence assembly with  
317 AMOS. *Curr Protoc Bioinformatics* **Chapter 11**, Unit 11.8 (2011).
- 318 28. Graham, E. D., Heidelberg, J. F. & Tully, B. J. BinSanity: unsupervised clustering of environmental  
319 microbial assemblies using coverage and affinity propagation. *PeerJ* **5**, e3035–19 (2017).
- 320 29. Parks, D. H., Imelfort, M., Skennerton, C. T., Hugenholtz, P. & Tyson, G. W. CheckM: assessing the quality  
321 of microbial genomes recovered from isolates, single cells, and metagenomes. *Genome Res.* **25**, 1043–1055  
322 (2015).
- 323 30. Alneberg, J. *et al.* Binning metagenomic contigs by coverage and composition. *Nat Meth* **11**, 1144–1146  
324 (2014).
- 325 31. Eren, A. M. *et al.* Anvi'o: an advanced analysis and visualization platform for 'omics data. *PeerJ* **3**, e1319  
326 (2015).
- 327 32. Hyatt, D., LoCascio, P. F., Hauser, L. J. & Uberbacher, E. C. Gene and translation initiation site prediction  
328 in metagenomic sequences. *Bioinformatics* **28**, 2223–2230 (2012).
- 329 33. Aziz, R. K. *et al.* The RAST Server: Rapid Annotations using Subsystems Technology. *BMC Genomics* **9**,  
330 75 (2008).
- 331 34. Matsen, F. A., Kodner, R. B. & Armbrust, E. V. pplacer: linear time maximum-likelihood and Bayesian  
332 phylogenetic placement of sequences onto a fixed reference tree. *BMC Bioinformatics* **11**, 538 (2010).
- 333 35. Bateman, A. *et al.* The Pfam Protein Families Database. *Nucleic Acids Res.* **30**, 276–280 (2002).
- 334 36. Finn, R. D., Clements, J. & Eddy, S. R. HMMER web server: interactive sequence similarity searching.  
335 *Nucleic Acids Res.* **39**, W29–W37 (2011).
- 336 37. Wu, D., Jospin, G. & Eisen, J. A. Systematic Identification of Gene Families for Use as 'Markers' for  
337 Phylogenetic and Phylogeny-Driven Ecological Studies of Bacteria and Archaea and Their Major  
338 Subgroups. *PLoS ONE* **8**, e77033–11 (2013).
- 339 38. Santos, S. R. & Ochman, H. Identification and phylogenetic sorting of bacterial lineages with universally  
340 conserved genes and proteins. *Environ. Microbiol.* **6**, 754–759 (2004).
- 341 39. Alexandre, A., Laranjo, M., Young, J. P. W. & Oliveira, S. dnaJ is a useful phylogenetic marker for  
342 alphaproteobacteria. *Int. J. Syst. Evol. Microbiol.* **58**, 2839–2849 (2008).
- 343 40. Benson, D. A. *et al.* GenBank. *Nucleic Acids Res.* **28**, 15–18 (2000).
- 344 41. Edgar, R. C. MUSCLE: multiple sequence alignment with high accuracy and high throughput. *Nucleic Acids*  
345 *Res.* **32**, 1792–1797 (2004).
- 346 42. Capella-Gutiérrez, S., Silla-Martínez, J. M. & Gabaldón, T. trimAl: a tool for automated alignment trimming  
347 in large-scale phylogenetic analyses. *Bioinformatics* **25**, 1972–1973 (2009).
- 348 43. Kearse, M. *et al.* Geneious Basic: an integrated and extendable desktop software platform for the  
349 organization and analysis of sequence data. *Bioinformatics* **28**, 1647–1649 (2012).
- 350 44. Price, M. N., Dehal, P. S. & Arkin, A. P. FastTree 2--approximately maximum-likelihood trees for large  
351 alignments. *PLoS ONE* **5**, e9490 (2010).
- 352 45. Markowitz, V. M. *et al.* The integrated microbial genomes (IMG) system. *Nucleic Acids Res.* **34**, D344–8  
353 (2006).
- 354 46. Kanehisa, M., Sato, Y., Kawashima, M., Furumichi, M. & Tanabe, M. KEGG as a reference resource for  
355 gene and protein annotation. *Nucleic Acids Res.* **44**, D457–D462 (2016).
- 356 47. Buchfink, B., Xie, C. & Huson, D. H. Fast and sensitive protein alignment using DIAMOND. *Nat Meth* **12**,  
357 59–60 (2014).
- 358 48. Langmead, B. & Salzberg, S. L. Fast gapped-read alignment with Bowtie 2. *Nat Meth* **9**, 357–359 (2012).
- 359 49. Albertsen, M. *et al.* Genome sequences of rare, uncultured bacteria obtained by differential coverage binning  
360 of multiple metagenomes. *Nat Biotechnol* **31**, 533–538 (2013).

- 361 50. Tully, B. J. & Heidelberg, J. F. Potential Mechanisms for Microbial Energy Acquisition in Oxic Deep-Sea  
362 Sediments. *Appl. Environ. Microbiol.* **82**, 4232–4243 (2016).  
363 51. Quinlan, A. R. & Hall, I. M. BEDTools: a flexible suite of utilities for comparing genomic features.  
364 *Bioinformatics* **26**, 841–842 (2010).  
365

366 **Acknowledgments:**

367 We would like to acknowledge and thank Drs. Eric Webb and William Nelson for providing  
368 invaluable comments and critiques in the early stages of this research. We are indebted to the  
369 *Tara Oceans* consortium for their commitment to open-access data that allows data aficionados  
370 to indulge in the data and attempt to add to the body of science contained within. And we thank  
371 the Center for Dark Energy Biosphere Investigations (C-DEBI) for providing funding to BJT and  
372 JFH (OCE-0939654). This is C-DEBI contribution number ###.

373 **Author contributions:** BJT conceived of the research plan, performed analysis, and wrote the  
374 manuscript. EDG performed analysis and wrote the manuscript. JFH provided funding, provided  
375 guidance, and edited the manuscript.

376 **Competing financial interests:** The authors declare no conflict of interest.  
377

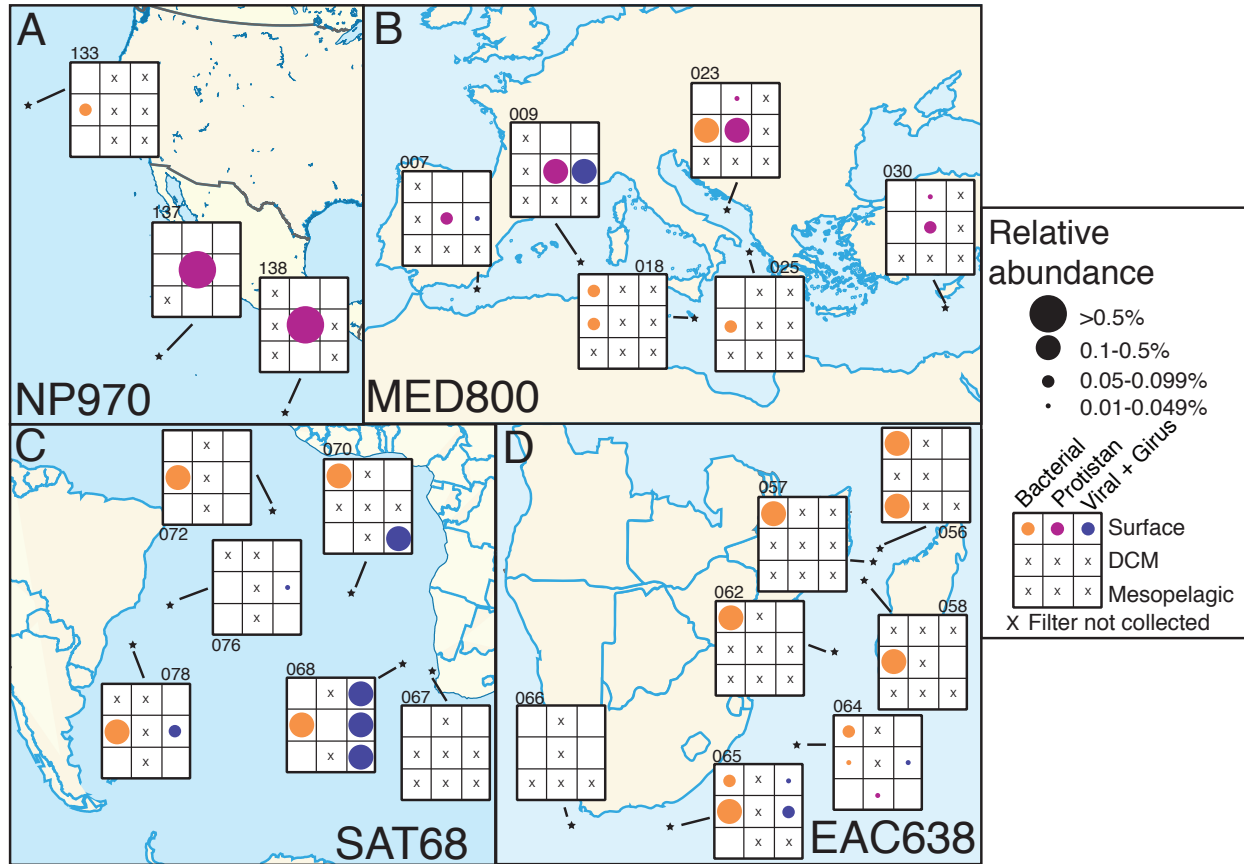

378

379 **Fig. 1.** The approximate locations of *Tara Oceans* sampling sites used to generate metagenomes  
 380 incorporated in to this study. Each grid represents the three possible sample depths and filter  
 381 fractions (top row: surface, middle row: DCM, bottom row: mesopelagic). An 'X' denotes that  
 382 no sample was collected for that depth and size fraction at the site. Circle size represents relative  
 383 abundance. (A) North Pacific – NP 970, (B) Mediterranean Sea – MED800, (C) South Atlantic  
 384 – SAT68, and (D) East Africa current – EAC638. Size fraction: orange, 'bacterial' (0.22-1.6 $\mu$ m);  
 385 purple, 'protistan' (0.8-5.0 $\mu$ m); blue, 'girus'+'viral' (<0.22-0.8 $\mu$ m).

386

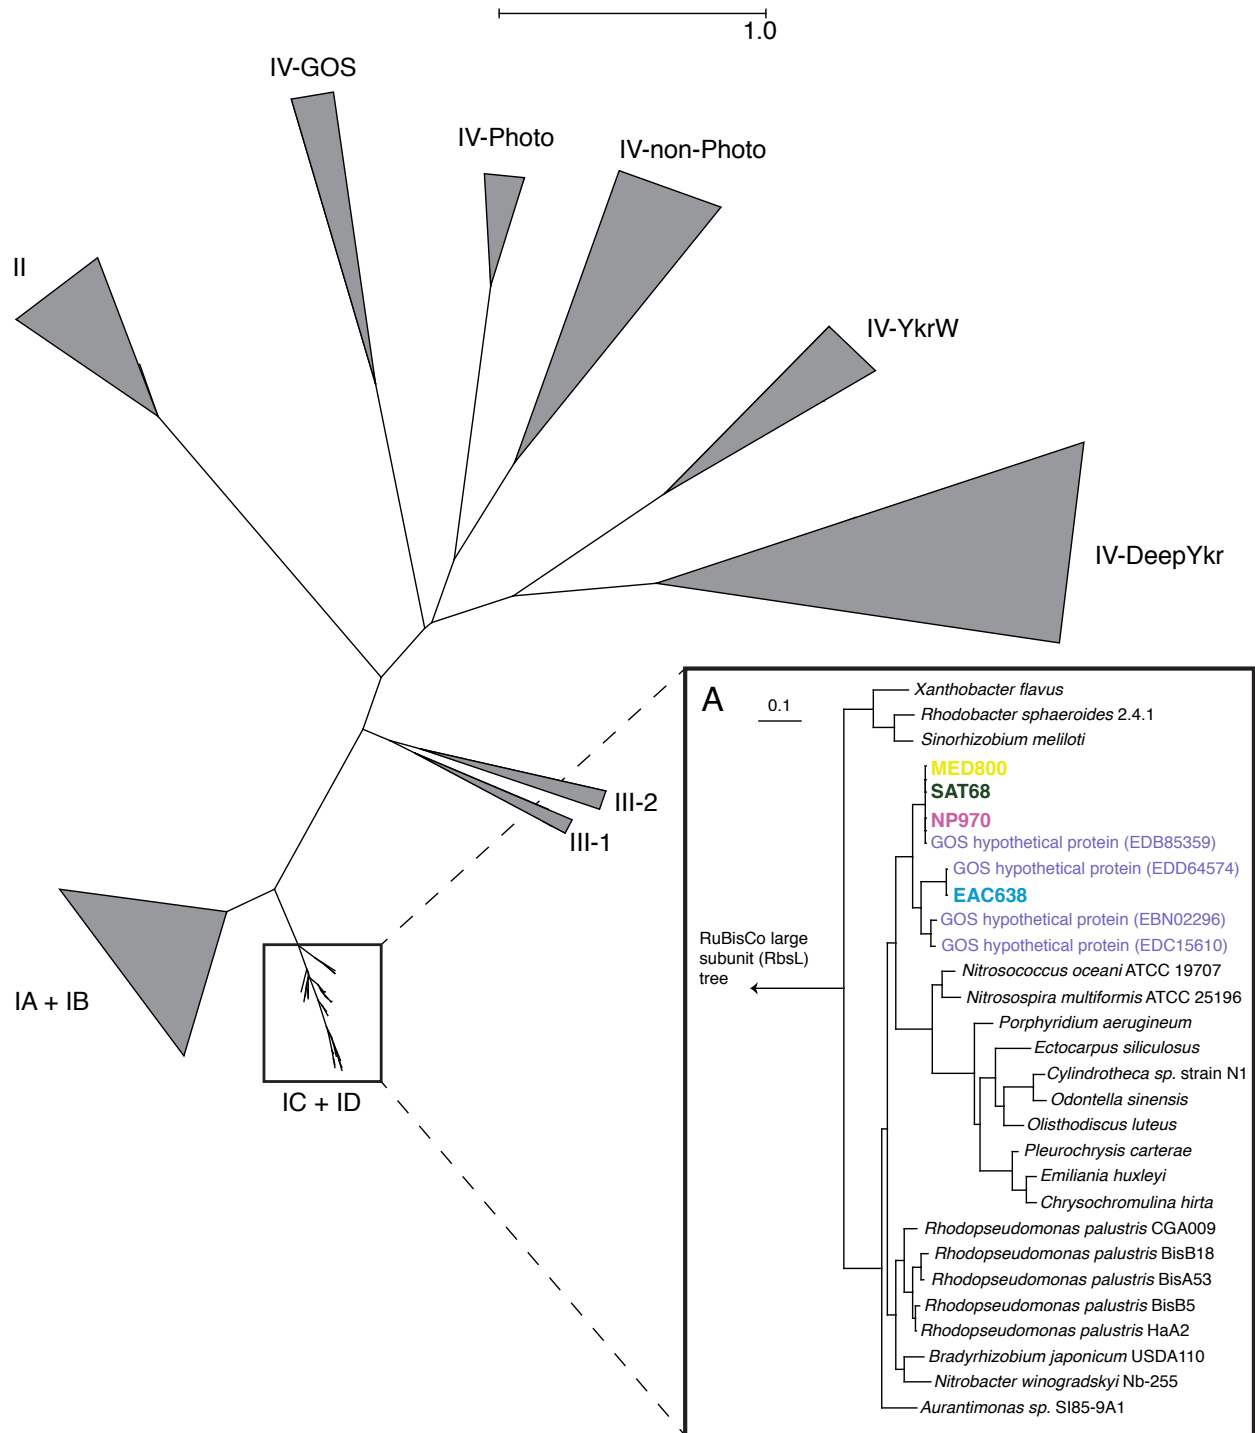

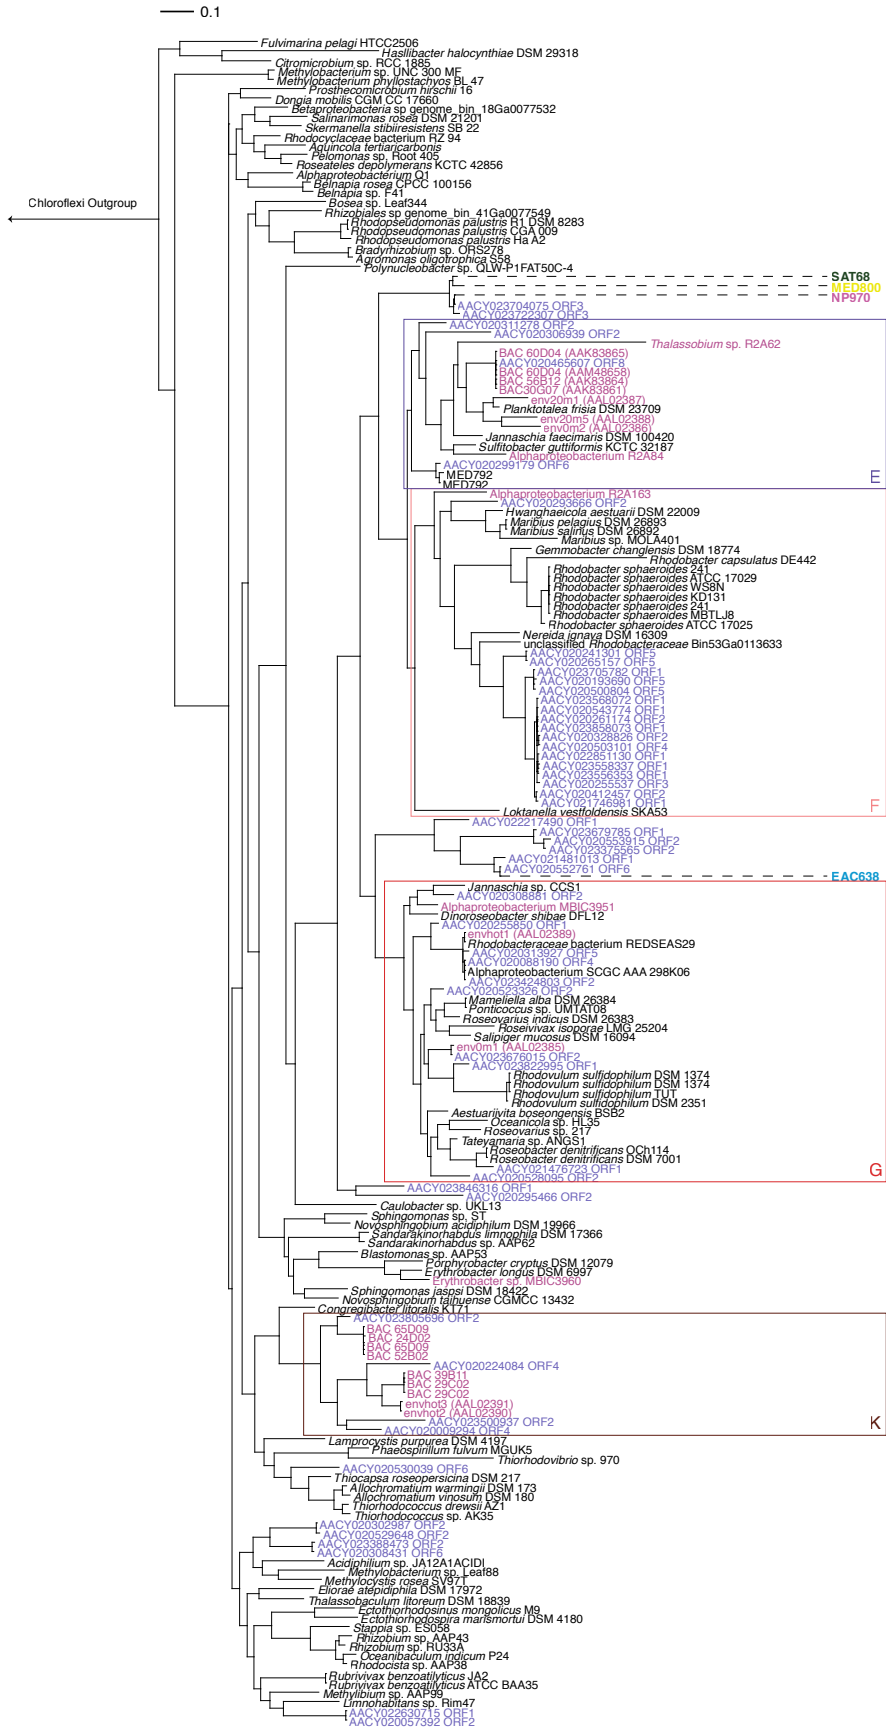



396 **Extended Data Fig. 3.** Phylogenetic tree of the M subunit of type-II photochemical reaction  
397 center (PufM). Environmental sequences obtained from the Global Ocean Survey (purple, •) and  
398 *Béjā et al.* (2002) (pink, •) are highlighted. Boxes illustrate approximate positions of  
399 phylogroups previously assigned by Yutin *et al.* (2007). Sequences used for this tree can be  
400 found in Supplementary Information 11. Phylogenetic distances and local support values can be  
401 found in Supplementary Information 13. Sequence information, including accession numbers and  
402 taxonomies can be found in Supplementary Information 9.  
403

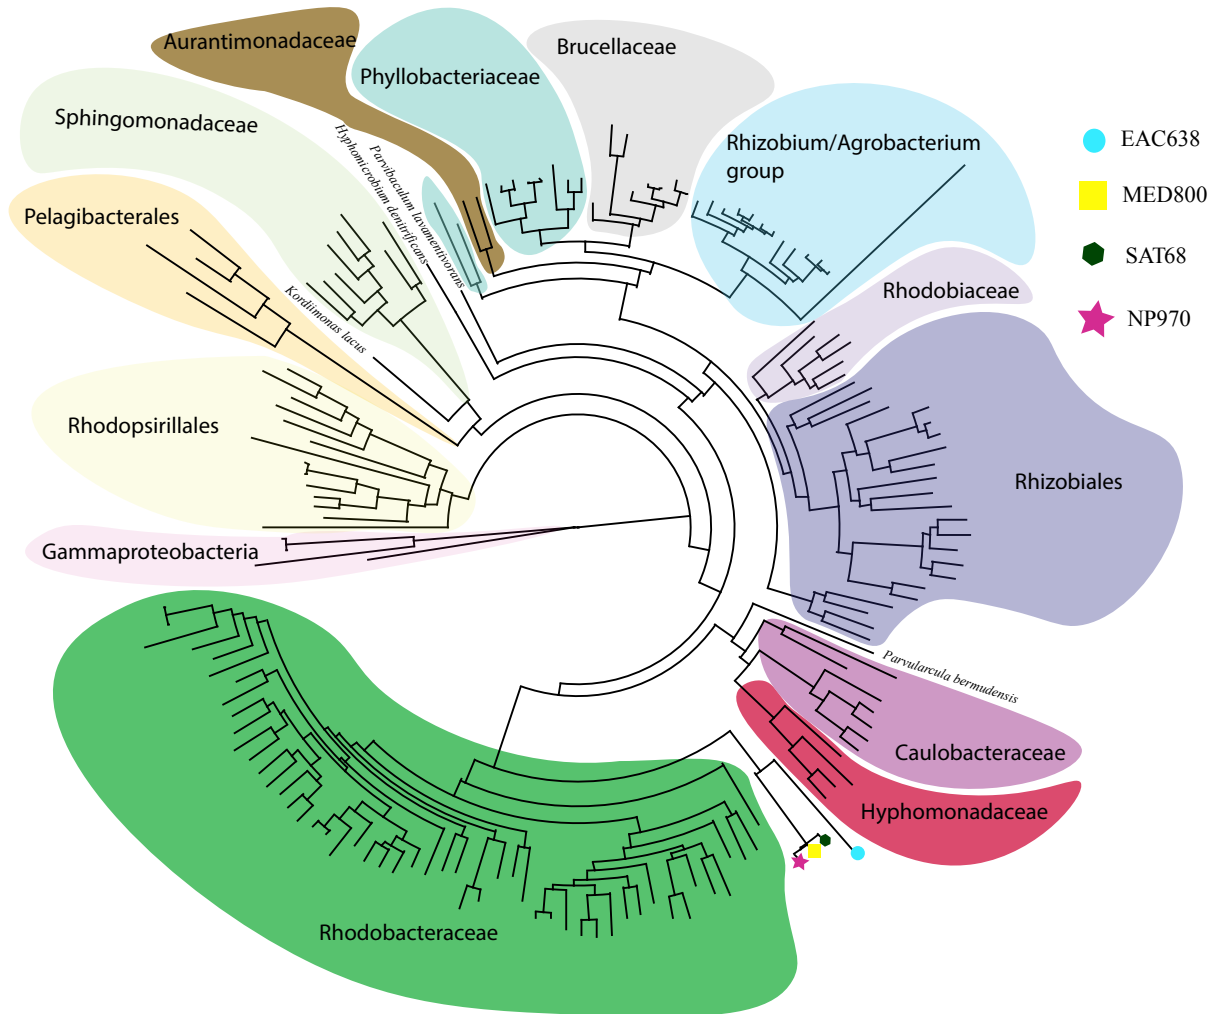

404

405 **Fig. 4.** Approximate maximum likelihood *Alphaproteobacteria* phylogenetic tree of 17  
406 concatenated single-copy marker genes for the *Tara* assembled and 160 reference genomes.  
407 Reference sequences from the *Gammaproteobacteria* used as an outgroup. Reference genome  
408 information, including accession numbers, can be found in Supplementary Information 4.  
409 Phylogenetic distances and local support values can be found in Supplementary Information 5.

410

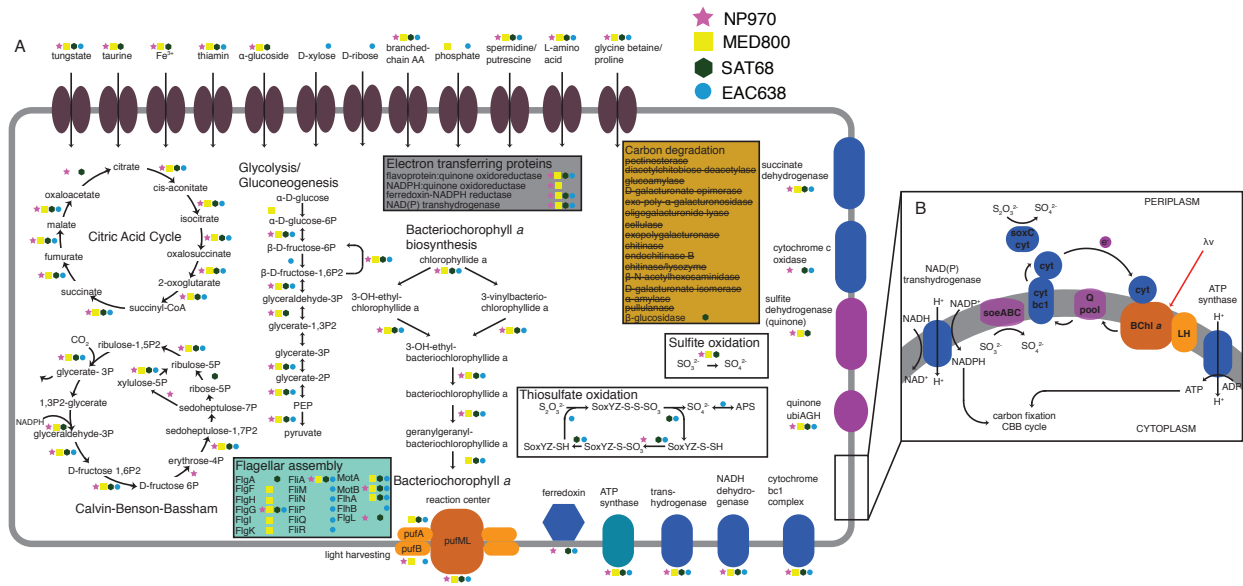

411

412 **Fig. 5.** Cellular schematic of the four reconstructed genomes. (A) The presence of a gene(s) in a  
 413 genome is represented by a yellow square (MED800), pink star (NP970), green hexagon  
 414 (SAT68), and/or blue circle (EAC638). Schematic illustrates predicted membrane bound  
 415 proteins, but does accurately represent cellular localization. (B) A detailed view of the proposed  
 416 flow of electrons from donors to photosynthesis and carbon fixation. Abbreviations: cyt,  
 417 cytochrome; Q pool, quinone pool; BChl a, bacteriochlorophyll a; LH, light-harvesting proteins;  
 418 soeABC, sulfite dehydrogenase (quinone); CBB, Calvin-Benson-Bassham.

419

420 **Table 1.** Statistics of the four *Tara* assembled genomes.

| <b>Genome ID</b> | <b>No. of contigs</b> | <b>Total length (bp)</b> | <b>Max. contig length (bp)</b> | <b>N50</b>    | <b>Mean length (bp)</b> | <b>GC (%)</b> | <b>No. of predicted CDS<sup>◇</sup></b> | <b>Est. Completeness (%)<sup>*</sup></b> | <b>Est. duplication/redundancy (Est. strain heterogeneity) (%)<sup>*</sup></b> |
|------------------|-----------------------|--------------------------|--------------------------------|---------------|-------------------------|---------------|-----------------------------------------|------------------------------------------|--------------------------------------------------------------------------------|
| <b>MED800</b>    | <b>174</b>            | <b>2,140,579</b>         | <b>55,951</b>                  | <b>13,831</b> | <b>12,302</b>           | <b>36.7</b>   | <b>2,184</b>                            | <b>66.98</b>                             | <b>2.36 (100.0)</b>                                                            |
| <b>SAT68</b>     | <b>192</b>            | <b>2,295,506</b>         | <b>63,422</b>                  | <b>13,440</b> | <b>11,956</b>           | <b>36.8</b>   | <b>2,334</b>                            | <b>85.02</b>                             | <b>5.37 (75.0)</b>                                                             |
| <b>EAC638</b>    | <b>121</b>            | <b>1,868,409</b>         | <b>80,916</b>                  | <b>19,502</b> | <b>15,441</b>           | <b>30.7</b>   | <b>1,939</b>                            | <b>68.88</b>                             | <b>4.75 (75.0)</b>                                                             |
| <b>NP970</b>     | <b>120</b>            | <b>2,585,639</b>         | <b>84,649</b>                  | <b>32,137</b> | <b>21,547</b>           | <b>36.1</b>   | <b>2,445</b>                            | <b>82.04</b>                             | <b>3.04 (33.33)</b>                                                            |

421 ◇, as determined using Prodigal

422 \*, as determine using CheckM with the Alphaproteobacteria markers (225 markers in 148 sets)

423 N50 - length of contig for which all contigs longer in length contain half of the total genome

424 CDS - coding DNA sequence

425

- 426 **Supplementary Materials:**  
427 Extended Data Figures 1-6  
428 Extended Data Table 1  
429 Supplementary Information 1-13

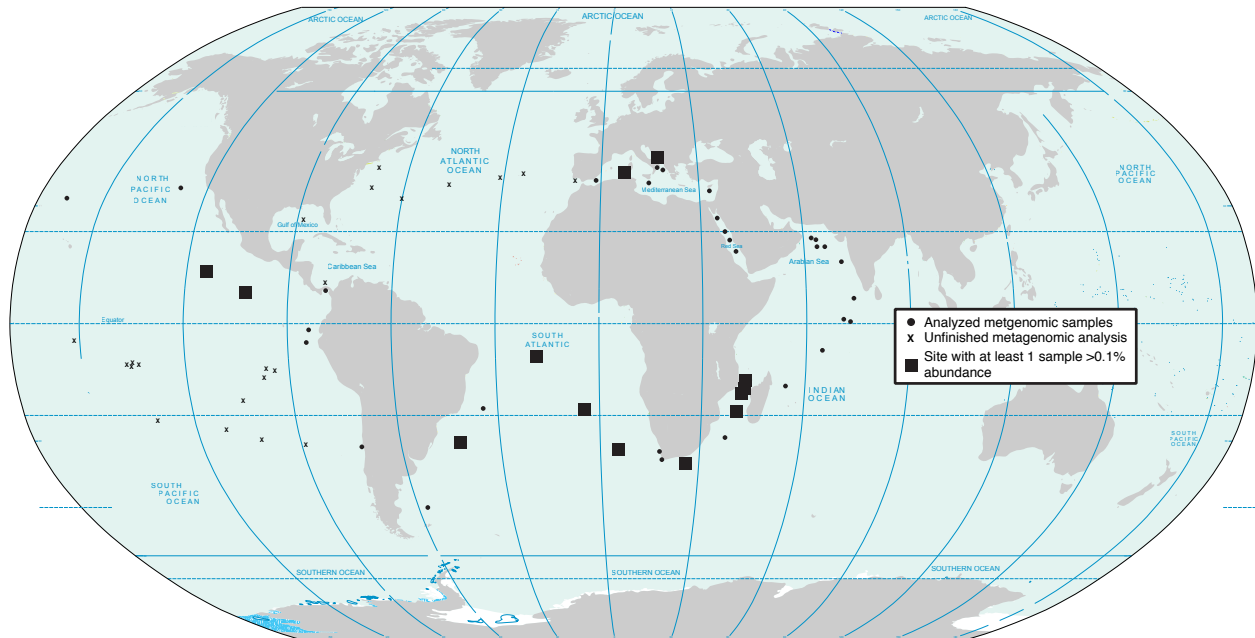

- 430  
431 **Extended Data Fig. 1.** A map illustrating the approximate locations of the *Tara Oceans*  
432 sampling stations. Stations and samples with  $>0.1\%$  relative abundance of the *Tara* assembled  
433 genomes are emphasized. Circles - stations for which metagenomes have been assembled,  
434 genomes have been reconstructed, and cursory functional analysis has been performed. Exes -  
435 stations awaiting assembly, binning, and analysis. Squares - stations where at least 1 sample had  
436  $>0.1\%$  abundance of the *Tara* assembled genomes.  
437





445

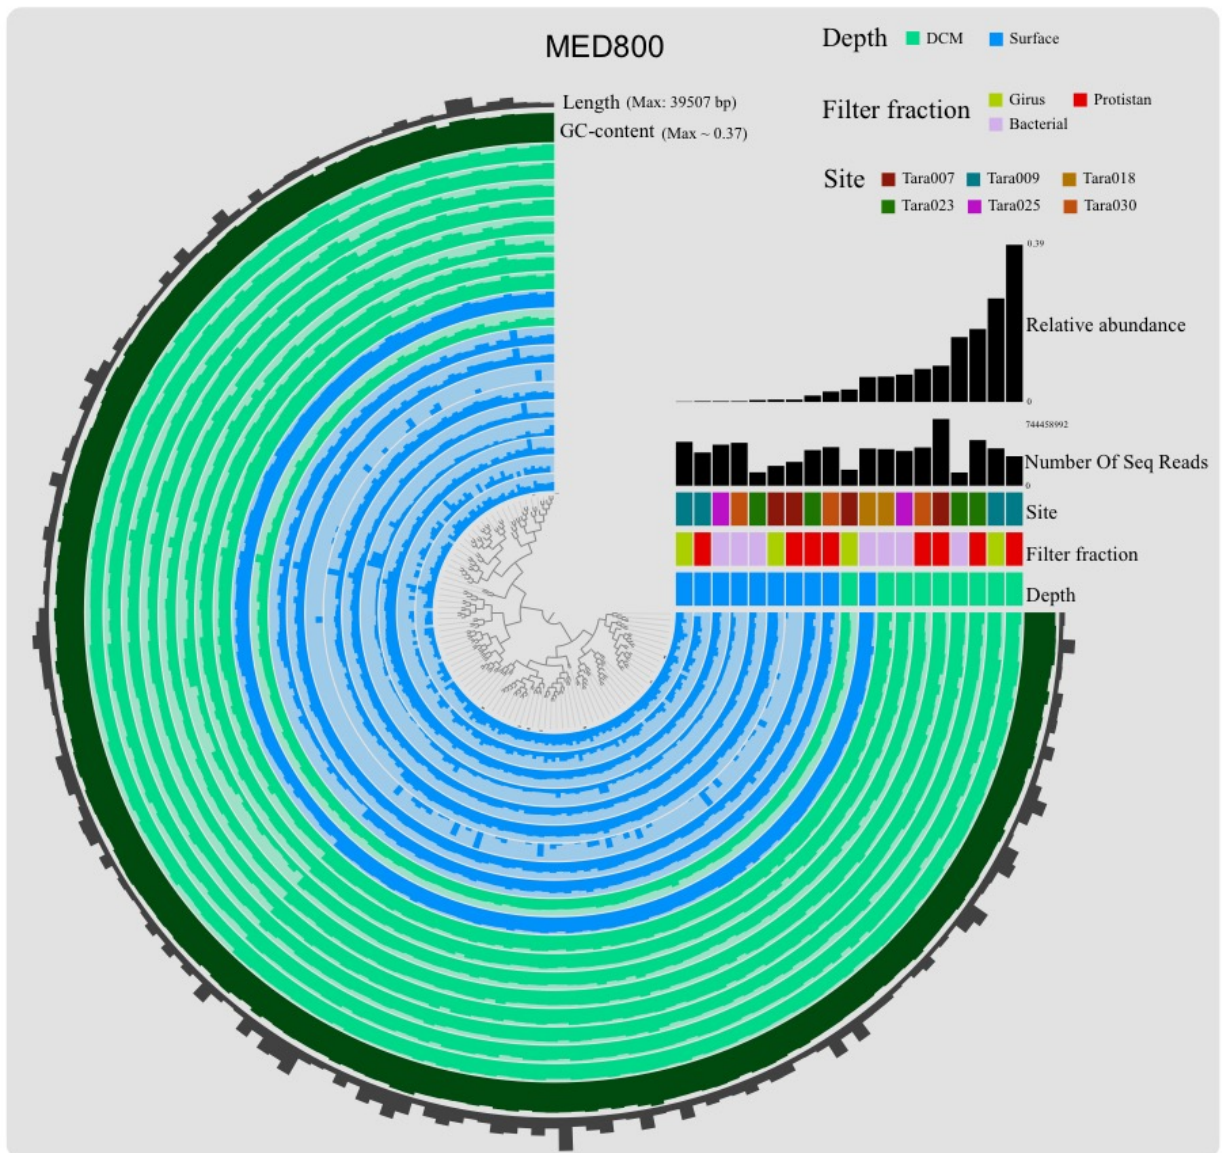

446

447

448

449

450

451

452

**Extended Data Fig. 3.** Visualization of MED800 using Anvi'o. Contigs are clustered in Anvi'o using Ward distance hierarchical clustering combining sequence composition and coverage information. Standardized coverage is shown for each sample. Relative abundance, number of sequencing reads generated, site, filter fraction, and depth are all shown. Completion, contamination, and strain heterogeneity were produced using CheckM.

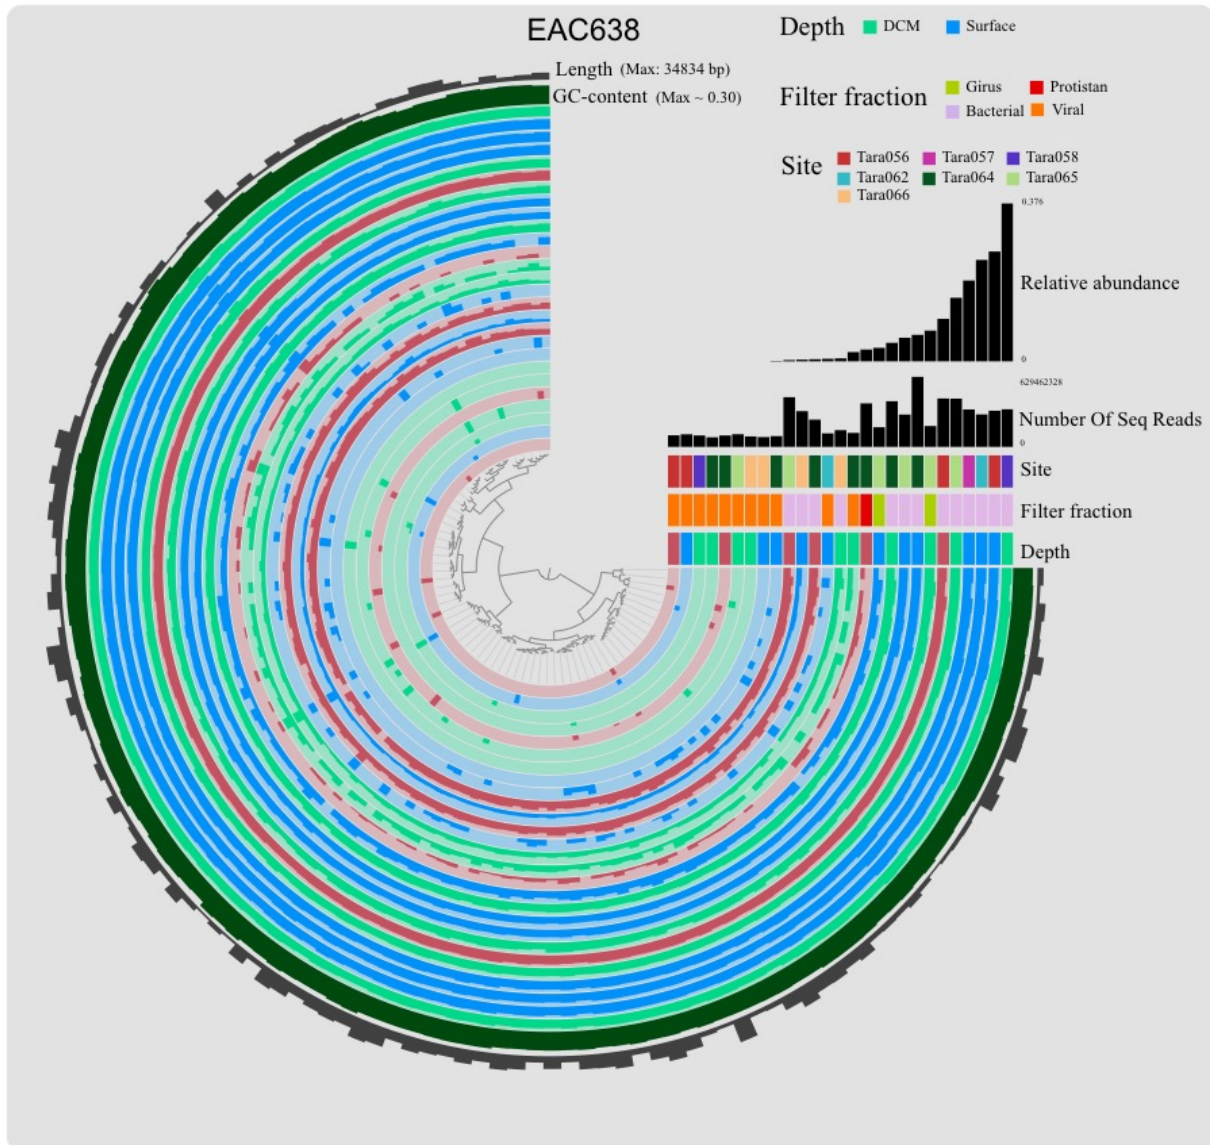

453  
454 **Extended Data Fig. 4.** Visualization of EAC638 using Anvi'o. Contigs are clustered in Anvi'o  
455 using Ward distance hierarchical clustering combining sequence composition and coverage  
456 information. Standardized coverage is shown for each sample. Relative abundance, number of  
457 sequencing reads generated, site, filter fraction, and depth are all shown. Completion,  
458 contamination, and strain heterogeneity were produced using CheckM.  
459



460

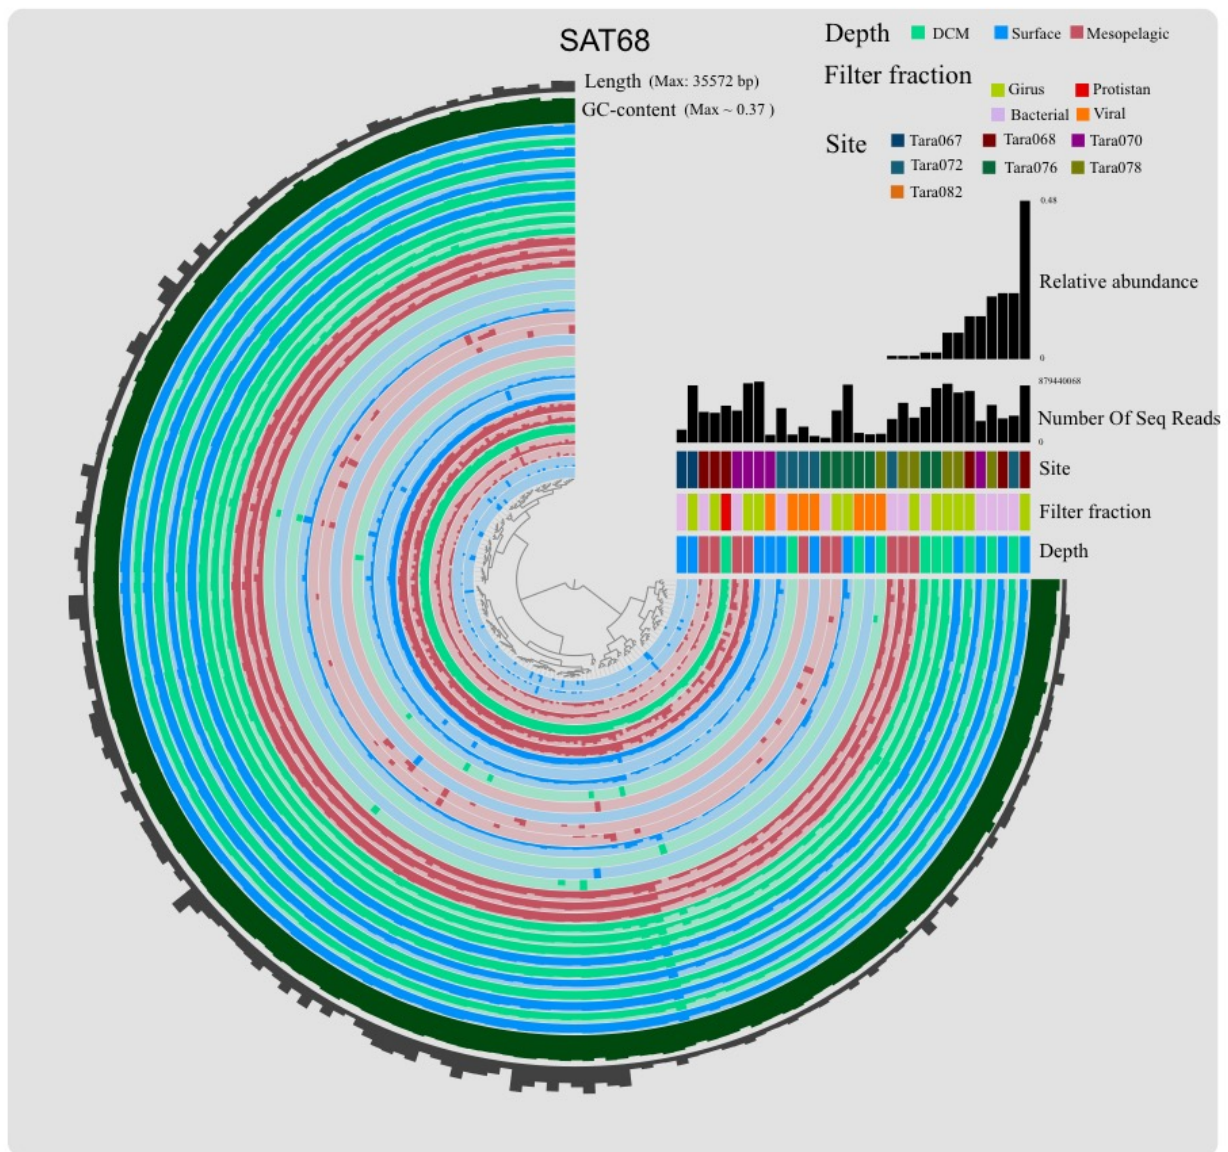

461  
462  
463  
464  
465  
466  
467

**Extended Data Fig. 5.** Visualization of SAT68 using Anvi'o. Contigs are clustered in Anvi'o using Ward distance hierarchical clustering combining sequence composition and coverage information. Standardized coverage is shown for each sample. Relative abundance, number of sequencing reads generated, site, filter fraction, and depth are all shown. Completion, contamination, and strain heterogeneity were produced using CheckM.

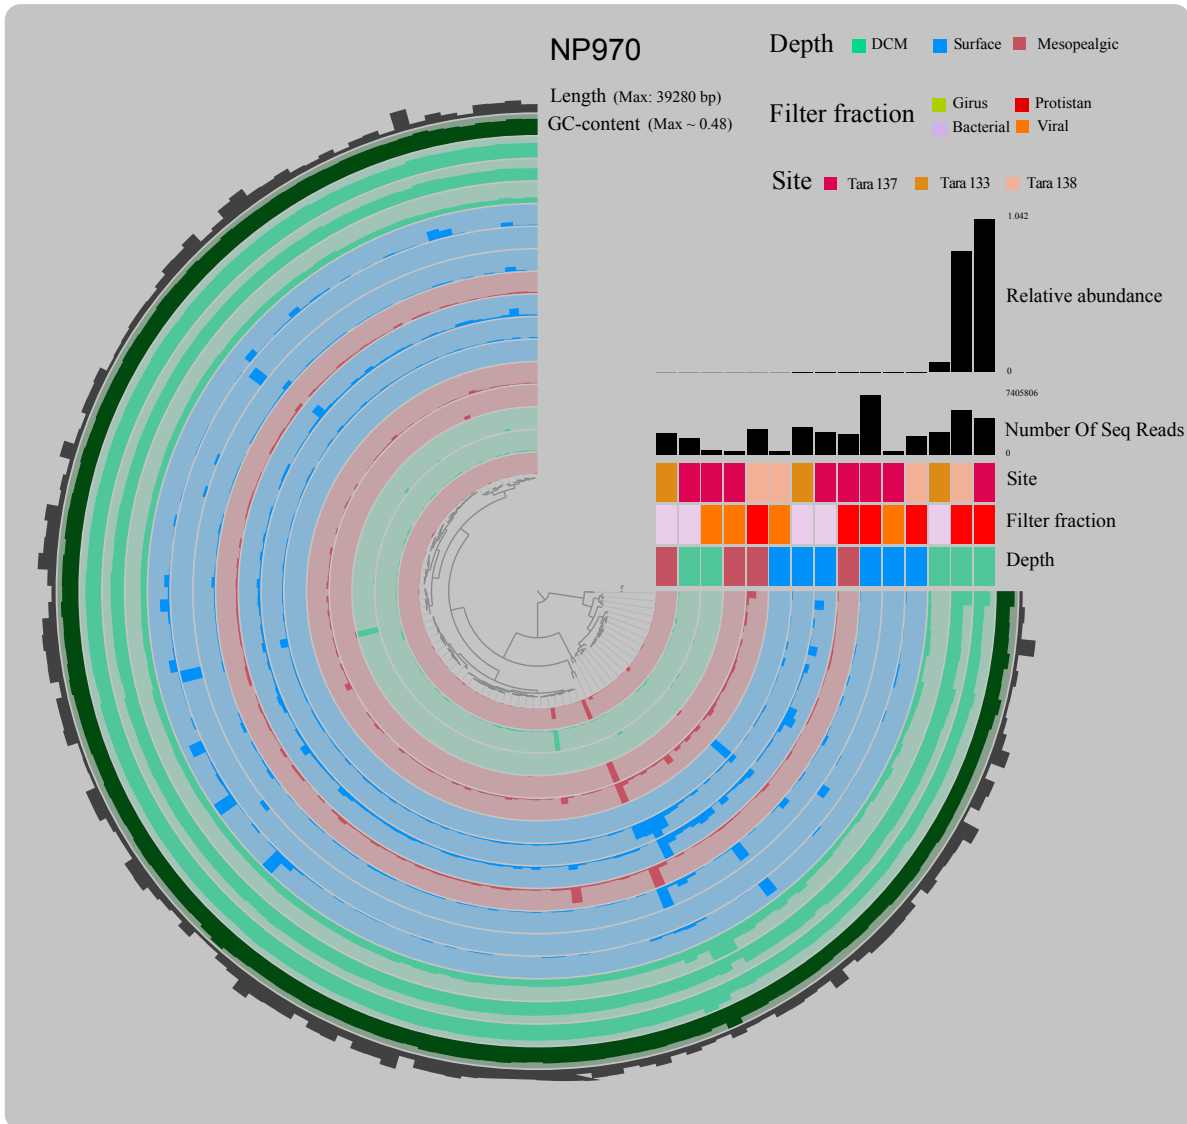

468  
469  
470  
471  
472  
473  
474

**Extended Data Fig. 6.** Visualization of NP970 using Anvi'o. Contigs are clustered in Anvi'o using Ward distance hierarchical clustering combining sequence composition and coverage information. Standardized coverage is shown for each sample. Relative abundance, number of sequencing reads generated, site, filter fraction, and depth are all shown. Completion, contamination, and strain heterogeneity were produced using CheckM.



475

476 **Extended Data Table 1.** Single-copy marker genes identified in each of the putative AAnP and  
477 reference genomes with corresponding Pfam identifiers.

478

| <b>Marker Gene Names</b>                                     |                |
|--------------------------------------------------------------|----------------|
| <b>Aminoacyl tRNA synthetase class II, N-terminal domain</b> | <b>PF02912</b> |
| <b>GTP1/OBG</b>                                              | <b>PF01018</b> |
| <b>RecA</b>                                                  | <b>PF00154</b> |
| <b>Ribosomal L17</b>                                         | <b>PF01196</b> |
| <b>Ribosomal L25p family</b>                                 | <b>PF01386</b> |
| <b>Ribosomal L28 protein</b>                                 | <b>PF00830</b> |
| <b>Ribosomal protein L20</b>                                 | <b>PF00453</b> |
| <b>Ribosomal protein L31</b>                                 | <b>PF01197</b> |
| <b>Ribosomal protein L35</b>                                 | <b>PF01632</b> |
| <b>Ribosomal protein L6</b>                                  | <b>PF00347</b> |
| <b>Ribosomal protein S11</b>                                 | <b>PF00411</b> |
| <b>Ribosomal protein S13/S18</b>                             | <b>PF00416</b> |
| <b>Ribosomal protein S14</b>                                 | <b>PF00253</b> |
| <b>Ribosomal protein S15</b>                                 | <b>PF00312</b> |
| <b>Ribosomal protein S4/S9 N-terminal domain</b>             | <b>PF00163</b> |
| <b>Ribosomal protein S5, N-terminal domain</b>               | <b>PF00333</b> |
| <b>RNA polymerase Rpb3/Rpb11 dimerisation domain</b>         | <b>PF01193</b> |

479

480 **Supplementary Information 1.** Information and statistics of the Tara stations and samples from  
481 the North Pacific, Mediterranean Sea, East Africa Coastal province, and South Atlantic.  
482 Includes, station, size fraction, depth, number of paired-end reads assembled, number of  
483 assemblies generated by Megahit, and relative abundance values for each genome.

484 **Supplementary Information 2.** Information about genes specifically referenced in manuscript  
485 and figures. Includes, KO identifiers, gene names, and gene abbreviations.

486 **Supplementary Information 3.** BlastKOALA annotations of the Prodigal predicted genes for  
487 each of the four genomes.

488 **Supplementary Information 4.** List of 2,889 reference genomes used to construct the  
489 *Alphaproteobacteria* phylogenetic tree.

490 **Supplementary Information 5.** Newick format of the *Alphaproteobacteria* phylogenetic tree  
491 containing 2,889 reference genomes. Contains branch lengths and local support values.

492 **Supplementary Information 6.** List of 85 reference genomes used to construct the  
493 *Alphaproteobacteria* phylogenetic tree in Figure 2.

494 **Supplementary Information 7.** Newick format of the *Alphaproteobacteria* phylogenetic tree  
495 containing X reference genomes. Contains branch lengths and local support values.

496 **Supplementary Information 8.** List of reference sequences used to construct the ribulose-1,5-  
497 bisphosphate carboxylase large subunit phylogenetic tree. Sequences collected from Tabita *et. al.*  
498 (2007).

499 **Supplementary Information 9.** List of reference sequences used to construct the photosynthetic  
500 reaction center M subunit phylogenetic tree. Sequences collected from Yutin *et. al.* (2007).

501 **Supplementary Information 10.** Sequences used to construct the ribulose-1,5-bisphosphate  
502 carboxylase large subunit phylogenetic tree in FASTA format.

503 **Supplementary Information 11.** Sequences used to construct the photosynthetic reaction center  
504 M subunit phylogenetic tree in FASTA format.

505 **Supplementary Information 12.** Newick format of the ribulose-1,5-bisphosphate carboxylase  
506 large subunit phylogenetic tree. Contains branch lengths and local support values.

507 **Supplementary Information 13.** Newick format of the photosynthetic reaction center M subunit  
508 phylogenetic tree. Contains branch lengths and local support values.  
509  
510
